# Supplementary material
Source: MDPI journal article supplement (https://www.mdpi.com/2225-1146/3/1/156)
Supplement: s1 [file s1]

	GDP	LGDP
1990-1	233919	12.362730180568613
1990-2	235635	12.370039276602149
1990-3	233141	12.359398699732875
1990-4	231894	12.35403564968769
1991-1	231383	12.351829625182981
1991-2	230609	12.348478914676488
1991-3	229923	12.345499749244429
1991-4	230595	12.348418204014809
1992-1	231898	12.354052898799361
1992-2	232154	12.355156223538698
1992-3	234152	12.363725756108414
1992-4	236250	12.37264584535599
1993-1	238726	12.383071729729936
1993-2	240363	12.389905559648057
1993-3	242825	12.400096298270531
1993-4	245157	12.409654100618287
1994-1	248574	12.423495866909477
1994-2	252248	12.438168009542203
1994-3	255968	12.452807715648548
1994-4	258184	12.461427788007537
1995-1	259318	12.465810386780399
1995-2	261086	12.472605133946704
1995-3	264444	12.485384787637757
1995-4	265989	12.491210233525303
1996-1	269017	12.502529853613151
1996-2	270395	12.507639131855722
1996-3	272642	12.515914858276933
1996-4	275471	12.526237638876657
1997-1	279315	12.540095456183973
1997-2	282613	12.55183374958996
1997-3	284906	12.5599145802853
1997-4	288003	12.570726175730497
1998-1	290348	12.578835482538139
1998-2	292562	12.586431889004436
1998-3	294735	12.593831926519407
1998-4	297672	12.603747488163275
1999-1	298606	12.606880257656281
1999-2	298657	12.607051036693736
1999-3	304272	12.625677317192057
1999-4	308317	12.638883753450362
2000-1	312542	12.652494139127722
2000-2	315650	12.662389283795772
2000-3	316749	12.665864941114471
2000-4	317688	12.668825048061716
2001-1	320100	12.676388725957954
2001-2	322235	12.683036372006651
2001-3	323720	12.687634223609638
2001-4	324161	12.688995584934045
2002-1	325891	12.694318248611252
2002-2	328303	12.701692241431484
2002-3	331081	12.710118337412796
2002-4	334554	12.720553580498775
2003-1	336308	12.725782685729694
2003-2	340795	12.739036402468169
2003-3	345165	12.751777842552784
2003-4	349680	12.764773729537197
2004-1	351975	12.771315429330729
2004-2	353516	12.77568402496351
2004-3	353808	12.77650967209718
2004-4	356183	12.783199922702146
2005-1	358872	12.790721057931789
2005-2	363550	12.803672118078202
2005-3	367037	12.813217939393663
2005-4	371811	12.826140939630646
2006-1	373227	12.82994209260527
2006-2	374520	12.833400485052826
2006-3	375451	12.835883248994985
2006-4	378330	12.84352210961803
2007-1	382040	12.853280594148673
2007-2	386977	12.866120538721248
2007-3	391767	12.878422554299066
2007-4	392205	12.879539941260775
2008-1	392786	12.881020213279411
2008-2	389239	12.871948829823593
2008-3	383626	12.857423398630925
2008-4	375388	12.835715436720589
2009-1	366124	12.810727352818692
2009-2	364573	12.806482084727042
2009-3	364557	12.806438196805814
2009-4	366107	12.810680919384424
2010-1	368033	12.815927887043646
2010-2	371779	12.826054870694755
2010-3	373275	12.830070692394864
2010-4	372529	12.828070166120408
2011-1	374264	12.832716709731841
2011-2	374628	12.833688812594909
2011-3	376862	12.839634351672959
2011-4	376462	12.838572391513475
2012-1	376324	12.838205753447555
2012-2	374754	12.834025089690401
2012-3	377684	12.841813146140572
2012-4	377231	12.840613010881974
2013-1	379113	12.845589592660081
2013-2	382090	12.853411461933138
2013-3	384996	12.86098822360556
